# Supplementary material
Source: HighWire-hosted journal article supplement (https://www.cmajopen.ca/highwire/filestream/81175/field_highwire_adjunct_files/1/2017-0081_original_submission.pdf)
Supplement: 2017-0081_original_submission.pdf [file 2017-0081_original_submission.pdf]

**Are caesarean section rates higher among family physicians than obstetricians?: A population-based cohort study using instrumental variable methods.**

|                               |                                                                                                                                                                                                                                                                                                                                                                                                                                                                                                                                                                                                                                                                                                                                                                                                                                                                                                                                                                                                                                                                                                                                                                                                                    |
|-------------------------------|--------------------------------------------------------------------------------------------------------------------------------------------------------------------------------------------------------------------------------------------------------------------------------------------------------------------------------------------------------------------------------------------------------------------------------------------------------------------------------------------------------------------------------------------------------------------------------------------------------------------------------------------------------------------------------------------------------------------------------------------------------------------------------------------------------------------------------------------------------------------------------------------------------------------------------------------------------------------------------------------------------------------------------------------------------------------------------------------------------------------------------------------------------------------------------------------------------------------|
| Journal:                      | <i>CMAJ</i>                                                                                                                                                                                                                                                                                                                                                                                                                                                                                                                                                                                                                                                                                                                                                                                                                                                                                                                                                                                                                                                                                                                                                                                                        |
| Manuscript ID                 | CMAJ-17-0140                                                                                                                                                                                                                                                                                                                                                                                                                                                                                                                                                                                                                                                                                                                                                                                                                                                                                                                                                                                                                                                                                                                                                                                                       |
| Manuscript Type:              | Research - Cohort study (retrospective)                                                                                                                                                                                                                                                                                                                                                                                                                                                                                                                                                                                                                                                                                                                                                                                                                                                                                                                                                                                                                                                                                                                                                                            |
| Date Submitted by the Author: | 07-Feb-2017                                                                                                                                                                                                                                                                                                                                                                                                                                                                                                                                                                                                                                                                                                                                                                                                                                                                                                                                                                                                                                                                                                                                                                                                        |
| Complete List of Authors:     | Dawe, Russell; Memorial University of Newfoundland Faculty of Medicine, Faculty of Medicine<br>Bishop, Jessica; Memorial University of Newfoundland Faculty of Medicine, Faculty of Medicine<br>Pendergast, Amanda; Memorial University of Newfoundland Faculty of Medicine, Faculty of Medicine<br>Avery, Susan; Memorial University of Newfoundland Faculty of Medicine, Faculty of Medicine<br>Monaghan, Kelly; Memorial University of Newfoundland Faculty of Medicine, Faculty of Medicine<br>Duggan, Norah; Memorial University of Newfoundland Faculty of Medicine, Faculty of Medicine<br>Aubrey-Bassler, Kris; Memorial University, Primary Healthcare Research Unit                                                                                                                                                                                                                                                                                                                                                                                                                                                                                                                                      |
| Keywords:                     | Family Medicine, General Practice, Primary Care, Obstetrics and Gynecology                                                                                                                                                                                                                                                                                                                                                                                                                                                                                                                                                                                                                                                                                                                                                                                                                                                                                                                                                                                                                                                                                                                                         |
| More Detailed Keywords:       | caesarean section, instrumental variable                                                                                                                                                                                                                                                                                                                                                                                                                                                                                                                                                                                                                                                                                                                                                                                                                                                                                                                                                                                                                                                                                                                                                                           |
| Abstract:                     | <p>Background: Previous research suggests that family physicians have lower or equivalent rates of caesarean section compared to obstetricians. However, family physicians are often thought to serve lower-risk patients than obstetricians, and adjustments for risk differences in previous analyses may have been inadequate. This study uses instrumental variable adjusted regression to estimate the relative risk of caesarean section in family physicians vs. obstetricians while adjusting for unmeasured confounders.</p> <p>Methods: This retrospective population-based cohort study included all Canadian (except Quebec) hospital deliveries between April 1st, 2006 and March 31st, 2009. Patients delivered by family physicians or obstetricians were included, except those with multiple gestations, birth weights less than 500 grams, or gestational ages less than 20 weeks at delivery.</p> <p>Results: 776,299 patients were included. The relative risk (RR) of caesarean delivery for patients of family physicians vs. those of obstetricians was 0.48, 95% confidence interval (CI) 0.41-0.56, (<math>p &lt; 0.0001</math>) using logistic regression, and 1.27 95% CI 1.02-1.57</p> |

1  
2  
3  
4  
5  
6  
7  
8  
9  
10  
11  
12  
13  
14  
15  
16  
17  
18  
19  
20  
21  
22  
23  
24  
25  
26  
27  
28  
29  
30  
31  
32  
33  
34  
35  
36  
37  
38  
39  
40  
41  
42  
43  
44  
45  
46  
47  
48  
49  
50  
51  
52  
53  
54  
55  
56  
57  
58  
59  
60

|  |                                                                                                                                                                                                                                                                                                                                                                                                                                                                                                                                                                                                     |
|--|-----------------------------------------------------------------------------------------------------------------------------------------------------------------------------------------------------------------------------------------------------------------------------------------------------------------------------------------------------------------------------------------------------------------------------------------------------------------------------------------------------------------------------------------------------------------------------------------------------|
|  | <p>(<math>p=0.030</math>) using instrumental variable adjusted regression.<br/>Interpretation: This suggests that patients of family physicians may have a higher risk of caesarean section when compared to patients of obstetricians. This application of the instrumental variable technique is relatively new in clinical research and should be interpreted cautiously. Further study is needed to assess whether family physicians across Canada serve a higher-risk demographic of patient than has previously been thought, and what additional factors may explain the above findings.</p> |
|  |                                                                                                                                                                                                                                                                                                                                                                                                                                                                                                                                                                                                     |

SCHOLARONE™  
Manuscripts

Confidential

1  
2  
3 **Are caesarean section rates higher among family physicians than**  
4 **obstetricians?: A population-based cohort study using instrumental variable**  
5 **methods.**  
6  
7  
8  
9

10  
11 Russell Eric Dawe MDiv MD<sup>1</sup>, Jessica Bishop BSc(Hons) MSc MD<sup>1</sup>, Amanda  
12  
13 Pendergast BSc(Hons) MD<sup>1</sup>, Susan Avery BSc MD<sup>1</sup>, Kelly Monaghan MBA PhD MD<sup>1</sup>,  
14  
15 Norah Duggan BSc, BMedSc, MD<sup>1</sup>, Kris Aubrey-Bassler MSc MD<sup>1,2</sup>  
16  
17

18  
19 <sup>1</sup>Discipline of Family Medicine, Memorial University of Newfoundland, St. John's,  
20  
21 Newfoundland and Labrador, Canada, A1B 3V6  
22  
23

24  
25 <sup>2</sup>Primary Healthcare Research Unit, Discipline of Family Medicine, Memorial  
26  
27 University of Newfoundland, St. John's, Newfoundland and Labrador, Canada, A1B  
28  
29 3V6  
30  
31

32  
33 CORRESPONDENCE to: Dr. Russell Dawe; r.dawe@mun.ca; 709-740-0515  
34  
35

36  
37 WORD COUNT: 2380  
38  
39

40  
41 NUMBER OF TABLES: 2  
42  
43

44  
45 NUMBER OF FIGURES: 1  
46  
47

48  
49 NUMBER OF REFERENCES: 41  
50  
51

52  
53 NUMBER OF SUPPLEMENTARY FILES: 1 (containing 1 Table)  
54  
55

56  
57 FUNDING for this study was provided to the research team through the Dr. A.R Cox  
58  
59 Research Grant via the Medical Research Endowment Fund at Memorial University  
60

1  
2  
3 of Newfoundland. The research reported was conducted independently of the  
4  
5 funder.  
6  
7

8  
9 COMPETING INTERESTS: None of the contributing authors have any competing  
10  
11 interests to disclose.  
12  
13

14 ***Disclaimer:*** *Parts of this article are based on data and information provided by the*  
15  
16 *Canadian Institute for Health Information (CIHI). However, the analyses, conclusions,*  
17  
18 *opinions and statements expressed herein are those of the authors and not those of*  
19  
20 *CIHI.*  
21  
22  
23

24  
25 ETHICS APPROVAL for this study was granted by the Human Investigations  
26  
27 Committee of Memorial University (Reference #09.168). Data release was guided by  
28  
29 the privacy regulations of the ethics board and of the Canadian Institute for Health  
30  
31 Information. Patient consent was not required.  
32  
33  
34  
35  
36  
37  
38  
39  
40  
41  
42  
43  
44  
45  
46  
47  
48  
49  
50  
51  
52  
53  
54  
55  
56  
57  
58  
59  
60

## ABSTRACT

**Background:** Previous research suggests that family physicians have lower or equivalent rates of caesarean section compared to obstetricians. However, family physicians are often thought to serve lower-risk patients than obstetricians, and adjustments for risk differences in previous analyses may have been inadequate. This study uses instrumental variable adjusted regression to estimate the relative risk of caesarean section in family physicians vs. obstetricians while adjusting for unmeasured confounders.

**Methods:** This retrospective population-based cohort study included all Canadian (except Quebec) hospital deliveries between April 1<sup>st</sup>, 2006 and March 31<sup>st</sup>, 2009. Patients delivered by family physicians or obstetricians were included, except those with multiple gestations, birth weights less than 500 grams, or gestational ages less than 20 weeks at delivery.

**Results:** 776,299 patients were included. The relative risk (RR) of caesarean delivery for patients of family physicians vs. those of obstetricians was 0.48, 95% confidence interval (CI) 0.41-0.56, ( $p < 0.0001$ ) using logistic regression, and 1.27 95% CI 1.02-1.57 ( $p = 0.030$ ) using instrumental variable adjusted regression.

**Interpretation:** This suggests that patients of family physicians may have a higher risk of caesarean section when compared to patients of obstetricians. This application of the instrumental variable technique is relatively new in clinical research and should be interpreted cautiously. Further study is needed to assess whether family physicians across Canada serve a higher-risk demographic of patient

1  
2  
3  
4  
5  
6  
7  
8  
9  
10  
11  
12  
13  
14  
15  
16  
17  
18  
19  
20  
21  
22  
23  
24  
25  
26  
27  
28  
29  
30  
31  
32  
33  
34  
35  
36  
37  
38  
39  
40  
41  
42  
43  
44  
45  
46  
47  
48  
49  
50  
51  
52  
53  
54  
55  
56  
57  
58  
59  
60

than has previously been thought, and what additional factors may explain the above findings.

Confidential

## INTRODUCTION

Caesarean section is a valuable and often life-saving intervention.(1) However, the widespread and rapid increase in its use has not been associated with improved health outcomes, and there are risks associated with the procedure.(1-4) The World Health Organization (WHO) has suggested a target caesarean section rate of  $\leq 10 - 15\%$  for a population (World Health Organization, Lancet, 1985),(5) which is exceeded by many countries, including Canada (27%).(6) Therefore, investigation into the factors that contribute to lower caesarean section rates are increasingly of interest.(7)

Some authors have found family physician (FP) maternity care to have equivalent(8) or higher(9) caesarean section rates compared to midwives; and lower(8-10) or equivalent(11) rates compared to obstetricians (OBs). FP and midwife rates of caesarean section may be lower than OBs due to their low-risk patient demographic.(11) However, others suggest FPs' and midwives' accessibility to underserved populations may give them high-risk patients also.(7,11,12) It is also possible that some types of provider are more diligent in coding the risk factors of their patients, confounding research which depends upon such documentation.

Some authors have assessed caesarean section rates by limiting the population studied to low risk patients.(9,13,14) This creates a more homogeneous cohort, which is more easily studied but less representative of the wider population. There is a need, therefore, for a method of analysis that can accommodate the whole population served, and this is what the instrumental variable (IV) approach

1  
2  
3 provides. IV adjustment acts like “a natural randomization of patients”(15) into  
4 cohorts with a different probability of receiving the treatment of interest, and thus  
5 leverages the benefits of randomization by decreasing heterogeneity across the  
6 treatment groups. This high-powered nation-wide study is the first to use  
7 instrumental variable (IV) methods to compare caesarean rates between FPs and  
8 OBs.  
9

## 18 **METHOD**

### 21 **Study Design, Data Sources and Population**

22 We accessed maternal and neonatal Discharge Abstracts Database (DAD) records  
23 from the Canadian Institute for Health Information (CIHI) for all deliveries between  
24 April 1<sup>st</sup>, 2006 and March 31<sup>st</sup>, 2009. The DAD captures clinically significant  
25 diagnoses with high sensitivity and specificity,(16,17) and has been used for  
26 numerous studies and reports of obstetrical outcomes.(4,18-26)  
27

28 Records were linked to Statistics Canada Census socioeconomic information using  
29 the maternal residential postal code and the Postal Code Conversion File.(27)  
30

31 Multiple gestations, and infants with birth weights less than 500 grams or  
32 gestational ages less than 20 weeks at delivery were excluded.(28,29) This research  
33 was approved by our provincial Health Research Ethics Board. We followed STROBE  
34 guidelines for reporting the results of observational studies.(30)  
35  
36  
37

### 38 **Record Linkage and Group Assignment**



1  
2  
3 Neonatal records were linked to the corresponding maternal record in order to  
4  
5 adjust for perinatal factors that may have affected the choice to deliver by caesarean  
6  
7 section. Linkage was conducted using a variable provided by CIHI, or probabilistic  
8  
9 linkage using additional variables. Infant records that could not be matched to a  
10  
11 single mother were excluded. The DAD includes 10 variables to record the types of  
12  
13 providers involved in the care of patients and the role they played. Records were  
14  
15 assigned to the FP group if a FP was coded at any point as the most responsible  
16  
17 provider (MRP). Midwife deliveries were designated in a similar fashion but were  
18  
19 excluded from the analysis because the sample size was insufficient to obtain  
20  
21 precise results using the primary statistical method. This classification  
22  
23 appropriately assigns patients for whom a FP delivery was planned but who  
24  
25 developed intrapartum complications requiring transfer to an OB or other provider  
26  
27 (e.g. for caesarean section). However, the approach may bias against family  
28  
29 physicians in some hospitals where care is shared between family physicians and  
30  
31 obstetricians. In these models, high risk patients (and the higher caesarean rate) for  
32  
33 whom an obstetrician delivery is planned are often admitted under the family  
34  
35 physician. Remaining patients were categorized into the obstetrics group if the  
36  
37 delivery provider was an obstetrician, and all remaining records were excluded. We  
38  
39 conducted sensitivity analyses testing different methods of group assignment  
40  
41 including assigning patients solely to the practitioner coded as the MRP, or to the  
42  
43 practitioner coded as the delivery provider.  
44  
45  
46  
47  
48  
49  
50  
51  
52

### 53 54 55 **Instrumental Variable** 56 57 58 59 60

1  
2  
3 Instrumental variable adjusted regression is a technique from the field of  
4  
5 econometrics that adjusts for unmeasured confounding in observational studies. An  
6  
7  
8 instrumental variable predicts the receipt of treatment (e.g., delivery by FP) but is  
9  
10 not directly associated with outcomes (e.g., caesarean section), except through its  
11  
12 effect on treatment. For this study we looked at the women living within the  
13  
14 catchment area of each local women's hospital and took the instrumental variable to  
15  
16 be the proportion of those women who were delivered by a FP. Thus we assume that  
17  
18 living in an area with a relatively high frequency of delivery by FP increases the  
19  
20 likelihood of being delivered by an FP (treatment) without directly acting as a risk  
21  
22 factor for caesarean section (outcome) itself.  
23  
24  
25  
26

27  
28 The IV also must not directly affect the unmeasured variables in order to adjust for  
29  
30 these. The unmeasured variables themselves may affect the receipt of treatment  
31  
32 and/or the outcomes directly. For example, in the current study the presence of  
33  
34 diabetes mellitus (DM) is an observed (i.e. measured) variable, but the severity of  
35  
36 that DM is unmeasured, even though severely uncontrolled DM may increase the  
37  
38 likelihood of delivery by an OB. Therefore, when we group our patients into  
39  
40 quintiles of the IV (Table 1), it is expected that these unmeasured variables will be  
41  
42 evenly distributed among the quintiles, since the IV is not directly associated with  
43  
44 the unmeasured variables themselves. For additional discussion regarding  
45  
46 instrumental variable techniques, please see the Appendix.  
47  
48  
49  
50  
51

### 52 53 **Hospital Catchment Areas** 54 55 56 57 58 59 60

1  
2  
3 Hospital catchment areas were defined using small area analysis methods, except  
4 that catchment areas were not adjusted for geographic contiguity.(31) Postal codes  
5 were assigned to a hospital if a plurality of patients living within the postal code  
6 were admitted to that hospital for their acute inpatient care. All (not just obstetrical)  
7 visits to acute care hospitals for the study period were used to assign patient postal  
8 codes to a hospital in this fashion.  
9  
10  
11  
12  
13  
14  
15  
16

### 17 18 19 **Study Outcome and Statistical Analysis**

20  
21  
22 The study outcome is the relative risk of caesarean section between deliveries  
23 managed primarily by family physicians compared to those managed by  
24 obstetricians. Caesarean deliveries were identified if any of the procedure variables  
25 included the International Statistical Classification of Disease and Related Health  
26 Problems - 10<sup>th</sup> revision – Canada (ICD 10-CA)(32) code 5MD60. We hypothesized  
27 that family physicians might be less comfortable performing procedural vaginal  
28 deliveries than obstetricians, and that this might increase their likelihood of  
29 choosing caesarean section. We therefore analyzed the rate of all procedural  
30 delivery (caesarean, vacuum and forceps delivery) as a secondary outcome. The  
31 additional ICD 10-CA codes included in this outcome were 5MD53-55. For  
32 information about how hospital service level and other covariates were determined,  
33 please see the Appendix.  
34  
35  
36  
37  
38  
39  
40  
41  
42  
43  
44  
45  
46  
47  
48  
49

50  
51  
52 The primary statistical approach used the generalized method of moments to  
53 estimate multiplicative structural mean models with published Stata syntax.(33)  
54 This method is thought to be the most robust method of estimation for instrumental  
55  
56  
57  
58  
59  
60

1  
2  
3 variable models with a dichotomous outcome and continuous instrumental  
4  
5  
6 variable.(33,34) We also used logistic regression in order to compare our results  
7  
8  
9 with previous literature.(35-37) Risk ratios rather than odds ratios were estimated  
10  
11 from our logistic models as described previously, and all models were adjusted for  
12  
13 clustering at the hospital level.(38) All analyses were conducted using Stata v. 13.1.  
14

## 15 16 **RESULTS**

17  
18  
19 The study cohort and exclusions are outlined in Figure 1. The final cohort included  
20  
21 776,299 mothers who delivered in 390 hospitals. Table 1 presents selected  
22  
23 characteristics of the study population, delivery providers, and hospitals across FP  
24  
25 delivery quintiles, and hospitals across FP  
26  
27 delivery quintiles. The main study findings are presented in Table 2.  
28  
29

### 30 **Strength of Instrumental Variable**

31  
32  
33 Our instrumental variable predicted a wide range in the mean percentage of  
34  
35 deliveries by a family physician (4.1% to 64.5% across quintiles). While there are  
36  
37 some differences in measured covariates across these quintiles (Table 1), there was  
38  
39 essentially no correlation between catchment area caesarean section rate and the IV  
40  
41 ( $r^2=6.6 \times 10^{-4}$ ), a required characteristic to ensure unbiased results. The F-statistic for  
42  
43 our instrumental variable ( $F=1165.94$ ) far exceeded the Stock-Yogo “critical value”  
44  
45 necessary to define a strong instrument.(39) The partial correlation coefficient  
46  
47 between the delivery provider and instrumental variable was 0.55, indicating that  
48  
49 30% of the variation in the rate of delivery by family physicians was explained by  
50  
51 the instrumental variable, also a marker of a strong instrument.  
52  
53  
54  
55  
56  
57  
58  
59  
60

## Sensitivity analyses

We compared multivariate models that both included and excluded variables for the service level of the delivery hospital. We also compared models with different definitions of delivery provider as described in Methods. Neither of these adjustments changed the direction of the estimated effects (risk ratio greater or less than 1.0) or the statistical significance of the association (data not shown).

## INTERPRETATION

This study's findings of increased risk of caesarean section for patients of FPs vs. OBs (RR = 1.27, Table 2) is surprising, given that previous studies suggest that caesarean rates are equivalent or lower for FPs than for OBs. In contrast, when the current data set was re-analysed using standard logistic regression, FP patients have a 52% lower risk of caesarean section than their obstetrician counterparts. Although this is among the most highly powered studies on this subject to date, and previous studies lacked the benefit of the instrumental variable, because of the novelty and magnitude of our finding and because of the methodological limitations outlined below, we believe our findings require confirmation before a widespread clinical and/or policy response should be considered. However, in light of this new information, it would be prudent for FPs providing intrapartum services to reflect carefully on decision-making pathways that culminate in caesarean section.

Several clinical studies have compared the results from different methods of observational analysis to those from randomized controlled trials. In a study of cardiac catheterization after myocardial infarction using hospital administrative

1  
2  
3 data, results from traditional observational methods suggest that catheterization  
4  
5 results in an almost 50% reduction in mortality, whereas RCTs quantify the benefit  
6  
7 at approximately 14%. Using the same observational data, these authors used IV  
8  
9 analyses to obtain results that were essentially identical to those from RCTs.(15)  
10  
11 Similarly, in a study of the effectiveness of long term control therapy on asthma  
12  
13 outcomes, IV analyses showed a protective effect comparable to what was observed  
14  
15 in RCTs, whereas traditional observational statistical methods suggested that the  
16  
17 medications exert no benefit.(40) In both of these studies, unmeasured factors  
18  
19 affected the treatment decision, thereby biasing the estimates from traditional  
20  
21 statistical methods. Because IV techniques account for these unobserved factors, the  
22  
23 results from these analyses are much closer to those from RCTs.  
24  
25  
26  
27  
28  
29

30  
31 Several factors may be responsible for our findings. First, FPs may emphasize a  
32  
33 patient centered approach to the point of deferring other interventions, such as  
34  
35 induction of labour, as the patient prefers. In some instances, such interventions  
36  
37 may have facilitated a vaginal delivery prior to complications that may be more  
38  
39 likely to occur after 41 weeks gestational age and ultimately lead to an urgent  
40  
41 caesarean section. Additionally, some FPs may be less skilled at identifying an  
42  
43 intrapartum malposition and rectifying the same (e.g., via manual rotation of an  
44  
45 occiput-posterior baby when the head is still high enough). Furthermore, in centers  
46  
47 where FPs do not have specialist OB support, FPs may be less comfortable with  
48  
49 instrumental vaginal delivery and may therefore be more likely to choose a  
50  
51 caesarean section when an instrumental vaginal delivery would be adequate. In  
52  
53 support of this hypothesis, when we analyzed the difference between FPs and OBs  
54  
55  
56  
57  
58  
59  
60

1  
2  
3 for all procedural deliveries (caesarean, forceps and vacuum delivery), we found a  
4  
5 relationship that was attenuated and non-significant in comparison to the  
6  
7 caesarean-alone analysis (Table 2). These or other factors not discussed may  
8  
9 interpret the study findings, but as a nationwide study capturing a variety of  
10  
11 circumstances, caution must be exercised in applying these results to any one  
12  
13 context.  
14  
15  
16

17  
18  
19 Caesarean sections have been associated with increased morbidity and mortality in  
20  
21 several studies,(1-4) and our findings raise the possibility that morbidity and  
22  
23 mortality may be increased in family medicine obstetrical patients as a result of  
24  
25 their higher adjusted caesarean rate. However, in a previous study, Aubrey-Bassler,  
26  
27 et al. found no difference between FP and OB cases in both maternal and newborn  
28  
29 morbidity and mortality using the same cohort used here.(41)  
30  
31  
32

### 33 34 **Limitations**

35  
36  
37 There are limitations to the instrumental variable approach. Although this type of  
38  
39 analysis has been used in the econometrics literature for almost 90 years, it is  
40  
41 relatively new to epidemiologists and clinical applications may require further  
42  
43 testing and refinement. As a new tool, it is not as well understood and may not be as  
44  
45 readily accepted as more traditional methods, especially when the results differ in a  
46  
47 potentially controversial manner, as in this case. Nevertheless, this also highlights  
48  
49 the need for this tool and its potential to address the limitations of traditional  
50  
51 approaches.  
52  
53  
54  
55  
56  
57  
58  
59  
60

1  
2  
3 A further limitation, in our case, is the incomplete randomizing effect of the  
4  
5 instrumental variable upon our patients. Under ideal conditions, the instrumental  
6  
7 variable works by equalizing the unobserved variables across different levels  
8  
9 (quintiles) of the instrumental variable. We checked the degree to which this was  
10  
11 successful by measuring covariates across categories of the instrumental variable  
12  
13 (Table 1). Where the observed variables are equal across quintiles, we assume the  
14  
15 unobserved variables have been likewise equalized. Among the most important  
16  
17 factors affecting the decision to pursue a caesarean section is a prior caesarean, and  
18  
19 these rates were quite similar across different levels of the IV (Table 1). However,  
20  
21 we found several variables that did differ across IV quintiles, and this variation  
22  
23 raises the possibility that unobserved variables also differ between levels of the IV.  
24  
25 For example, the Aboriginal representation across quintiles ranged from 2.4 – 10.9  
26  
27 %. Our data (not shown) indicate that caesarean section rates are lower in  
28  
29 populations with higher proportions of aboriginals, but we adjusted for this factor in  
30  
31 our multivariate analyses. This observation is only important if unobserved factors  
32  
33 also vary across levels of the instrumental variable, and by a sufficient magnitude to  
34  
35 explain our findings. Because aboriginal populations tend to be higher in regions  
36  
37 with a higher proportion of family physicians, and their caesarean rates tend to be  
38  
39 lower, unobserved variables varying in a similar pattern would tend to lessen the  
40  
41 effect we observed. Thus, we feel that fully adjusted Caesarean section rates are  
42  
43 likely higher in FP patients than in OB patients in Canada, but because of the  
44  
45 limitations we outlined, the magnitude of the effect we observed should be  
46  
47 interpreted cautiously.  
48  
49  
50  
51  
52  
53  
54  
55  
56  
57  
58  
59  
60



## Conclusion

OBs appear to have lower caesarean section rates compared to FPs when the instrumental variable method of analysis is used to adjust for unobserved variables. This is a relatively new application of the instrumental variable method and its findings differ from those of a standard logistic regression analysis, so they should be interpreted with caution. Further study of the wider population, not just low risk patients, is needed to verify these preliminary findings.

Confidential

- 1  
2  
3 (1) Marshall JL, Spiby H, McCormick F. Evaluating the 'Focus on Normal Birth and  
4 Reducing Caesarean section Rates Rapid Improvement Programme': A mixed  
5 method study in England. *Midwifery* 2015 Feb;31(2):332-340.  
6  
7
- 8 (2) Deneux-Tharaux C, Carmona EF, Bouvier-Colle MF, Breart G. Postpartum  
9 maternal mortality and cesarean delivery. *Obstet Gynecol* 2006;108(3):541-548.  
10  
11
- 12 (3) Blanchette H. The rising cesarean delivery rate in America: what are the  
13 consequences? *Obstet Gynecol* 2011;118(3):687-690.  
14  
15
- 16 (4) Liu S, Liston RM, Joseph KS, Heaman M, Sauve R, Kramer MS. Maternal mortality  
17 and severe morbidity associated with low-risk planned cesarean delivery versus  
18 planned vaginal delivery at term. *Can Med Assoc J* 2007;176:455-460.  
19  
20
- 21 (5) World Health Organization. Appropriate technology for birth. *Lancet*  
22 1985;2(8452):436-437.  
23  
24
- 25 (6) Canadian Institute for Health Information. Health Indicators 2013. Ottawa: CIHI;  
26 2013.  
27  
28
- 29 (7) King TL. Preventing primary cesarean sections: intrapartum care. *Semin*  
30 *Perinatol* 2012 Oct;36(5):357-364.  
31  
32
- 33 (8) Harris SJ, Janssen PA, Saxell L, Carty EA, MacRae GS, Petersen KL. Effect of a  
34 collaborative interdisciplinary maternity care program on perinatal outcomes. *CMAJ*  
35 2012 Nov 20;184(17):1885-1892.  
36  
37
- 38 (9) Walters D, Gupta A, Nam AE, Lake J, Martino F, Coyte PC. A cost-effectiveness  
39 analysis of low-risk deliveries: A comparison of midwives, family physicians and  
40 obstetricians. *Health Policy* 2015 2015/;11(1):61-75.  
41  
42
- 43 (10) Avery DM, Graettinger KR, Waits S, Parton JM. Comparison of delivery  
44 procedure rates among obstetrician-gynecologists and family physicians practicing  
45 obstetrics. *Am J Clin Med* 2014;10(1):16-20.  
46  
47
- 48 (11) Nicholson JM. Risk adjustment in maternity care: The use of indirect  
49 standardization. *Int J Womens Health* 2010 2010/;2(1):255-262.  
50  
51
- 52 (12) Wilkes E, Gamble J, Adam G, Creedy DK. Reforming maternity services in  
53 Australia: Outcomes of a private practice midwifery service. *Midwifery* 2015  
54 Oct;31(10):935-940.  
55  
56
- 57 (13) Tracy SK, Welsh A, Hall B, Hartz D, Lainchbury A, Bisits A, et al. Caseload  
58 midwifery compared to standard or private obstetric care for first time mothers in a  
59 public teaching hospital in Australia: a cross sectional study of cost and birth  
60 outcomes. *BMC Pregnancy Childbirth* 2014 Jan 24;14:46-2393-14-46.

1  
2  
3 (14) Li Y, Townend J, Rowe R, Knight M, Brocklehurst P, Hollowell J. The effect of  
4 maternal age and planned place of birth on intrapartum outcomes in healthy women  
5 with straightforward pregnancies: Secondary analysis of the Birthplace national  
6 prospective cohort study. *BMJ Open* 2014 /;4(1).  
7  
8

9 (15) Stukel TA, Fisher ES, Wennberg DE, Alter DA, Gottlieb DJ, Vermeulen MJ.  
10 Analysis of observational studies in the presence of treatment selection bias: Effects  
11 of invasive cardiac management on ami survival using propensity score and  
12 instrumental variable methods. *JAMA* 2007 January 17;297(3):278-285.  
13  
14

15 (16) Joseph KS, Fahey J, for the Canadian Perinatal Surveillance System. Validation  
16 of perinatal data in the Discharge Abstract Database of the Canadian Institute for  
17 Health Information. *Chronic Dis Can* 2009;29(3):96-100.  
18  
19

20 (17) Canadian Institute for Health Information. CIHI Data Quality Study of the 2007-  
21 2008 Discharge Abstract Database. Ottawa: CIHI; 2010.  
22  
23

24 (18) Wen SW, Huang L, Liston R, Heaman M, Baskett T, Rusen ID, et al. Severe  
25 maternal morbidity in Canada, 1991-2001. *Can Med Assoc J* 2005;173(7):759-764.  
26  
27

28 (19) Joseph KS, Liu S, Rouleau J, Kirby RS, Kramer MS, Sauve R, et al. Severe  
29 maternal morbidity in Canada, 2003 to 2007: Surveillance using routine  
30 hospitalization data and ICD-10CA Codes. *J Obstet Gynaecol Can* 2011;32(9):837-  
31 846.  
32

33 (20) Joseph KS, Rouleau J, Kramer MS, Young DC, Liston RM, Baskett TF, et al.  
34 Investigation of an increase in postpartum haemorrhage in Canada. *Br J Obstet*  
35 *Gynaecol* 2007;114:751-759.  
36  
37

38 (21) Kramer MS, Rouleau J, Baskett TF, Joseph KS. Amniotic-fluid embolism and  
39 medical induction of labour: a retrospective, population-based cohort study. *Lancet*  
40 2006;368:1444-1448.  
41  
42

43 (22) Wen SW, Rusen ID, Walker M, Liston R, Kramer MS, Baskett T, et al. Comparison  
44 of maternal mortality and morbidity between trial of labor and elective cesarean  
45 section among women with previous cesarean delivery. *Am J Obstet Gynecol*  
46 2004;191(4):1263.  
47  
48

49 (23) Aubrey-Bassler K, Newbery S, Kelly L, Weaver B, Wilson S. Maternal outcomes  
50 of cesarean sections: Do generalists' patients have different outcomes than  
51 specialists' patients? *Can Fam Physician* 2007;53(12):2132-2138.  
52  
53

54 (24) Public Health Agency of Canada. Canadian Perinatal Health Report. 2008th ed.  
55 Ottawa: Public Health Agency of Canada; 2008.  
56  
57  
58  
59  
60

- 1  
2  
3 (25) Health Canada. Canadian Perinatal Health Report 2003. Ottawa, Canada:  
4 Minister of Public Works and Government Services Canada; 2003.  
5  
6  
7 (26) Health Canada. Special report on maternal mortality and severe morbidity in  
8 Canada. Enhanced surveillance: the path to prevention. Ottawa, Canada: Minister of  
9 Public Works and Government Services Canada; 2004.  
10  
11 (27) Wilkins R, Khan S. PCCF+ Version 5H User's Guide. 5H ed. Ottawa, ON: Health  
12 Information and Research Division, Statistics Canada; 2011.  
13  
14 (28) Phibbs CS, Baker LC, Caughey AB, Danielsen B, Schmitt SK, Phibbs RH. Level and  
15 Volume of Neonatal Intensive Care and Mortality in Very-Low-Birth-Weight Infants.  
16 N Engl J Med 2007;356(21):2165-2175.  
17  
18 (29) Goodman DC, Fisher ES, Little GA, Stukel TA, Chang C, Schoendorf KS. The  
19 Relation between the Availability of Neonatal Intensive Care and Neonatal Mortality.  
20 N Engl J Med 2002;346(20):1538-1544.  
21  
22 (30) Elm Ev, Altman DG, Egger M, Pocock SJ, Gøtzsche PC, Vandenbroucke JP.  
23 Strengthening the reporting of observational studies in epidemiology (STROBE)  
24 statement: guidelines for reporting observational studies. BMJ 2007 BMJ Publishing  
25 Group Ltd;335(7624):806-808.  
26  
27 (31) Dartmouth Atlas of Health Care. 2012; Available at:  
28 <http://www.dartmouthatlas.org/>. Accessed November 15, 2014.  
29  
30 (32) Canadian Institute for Health Information. International Statistical  
31 Classification of Diseases and Related health Problems - 10th Revision - Canada  
32 (ICD-10-CA). Ottawa, Canada: Canadian Institute for Health Information; 2009.  
33  
34 (33) Palmer TM, Sterne JAC, Harbord RM, Lawlor DA, Sheehan NA, Meng S, et al.  
35 Instrumental Variable Estimation of Causal Risk Ratios and Causal Odds Ratios in  
36 Mendelian Randomization Analyses. Am J Epidemiol 2011 May 09;173(12):1392-  
37 1403.  
38  
39 (34) Clarke PS, Windmeijer F. Instrumental Variable Estimators for Binary  
40 Outcomes. J Am Stat Assoc 2012;107(500):1638-1652.  
41  
42 (35) Rosenblatt RA, Dobie SA, Hart LG, Schneeweiss R, Gould D, Raine TR, et al.  
43 Interspecialty differences in the obstetric care of low-risk women. Am J Public  
44 Health 1997;87(3):344-351.  
45  
46 (36) Hueston WJ. Site-to-site variation in the factors affecting cesarean section rates.  
47 Arch Fam Med 1995 Apr;4(4):346-51.  
48  
49  
50  
51  
52  
53  
54  
55  
56  
57  
58  
59  
60

1  
2  
3 (37) Hueston WJ, Applegate JA, Mansfield CJ, King DE, McClafin R. Practice  
4 variations between family physicians and obstetricians in the management of low-  
5 risk pregnancies. *J Fam Pract* 1995;40(4):345-51.  
6  
7

8 (38) Norton EC, Miller MM, Kleinman LC. Computing adjusted risk ratios and risk  
9 differences in Stata. *Stata Journal* 2013;13(3):492-509.  
10

11 (39) Stock JH, Yogo M. Testing for Weak Instruments in Linear IV Regression.  
12 *Identification and Inference for Econometric Models: Essays in Honor of Thomas*  
13 *Rothenberg*: Available at SSRN: <http://ssrn.com/abstract=1734933>; 2005. p. 80-  
14 108.  
15  
16

17 (40) Fang G, Brooks JM, Chrischilles EA. Comparison of Instrumental Variable  
18 Analysis Using a New Instrument With Risk Adjustment Methods to Reduce  
19 Confounding by Indication. *Am J Epidemiol* 2012 June 01;175(11):1142-1151.  
20  
21

22 (41) Aubrey-Bassler K, Cullen RM, Simms A, Asghari S, Crane J, Wang PP, et al.  
23 Outcomes of deliveries by family physicians or obstetricians: a population-based  
24 cohort study using an instrumental variable. *Can Med Assoc J* 2015 August  
25 24;187(15):1125-1132.  
26  
27  
28  
29  
30  
31  
32  
33  
34  
35  
36  
37  
38  
39  
40  
41  
42  
43  
44  
45  
46  
47  
48  
49  
50  
51  
52  
53  
54  
55  
56  
57  
58  
59  
60

Table 1: Selected Characteristics of the Study Cohort (data are percentages unless otherwise indicated)

|                                | Quintile of Catchment FP Delivery Rate |        |        |        |        | All    |
|--------------------------------|----------------------------------------|--------|--------|--------|--------|--------|
|                                | 1                                      | 2      | 3      | 4      | 5      |        |
| FP Deliveries                  | 4.3                                    | 9.2    | 16.9   | 40.2   | 69.1   | 28.1   |
| Missing data*                  | 1.1                                    | 1.3    | 1.4    | 2.9    | 1.8    | 1.7    |
| Sample (no. mothers)           | 148059                                 | 158593 | 160518 | 151206 | 157923 | 776299 |
| Predicted CS Rate <sup>†</sup> | 28.4                                   | 28.9   | 27.8   | 27.8   | 27.1   | 28.0   |
| <b>Demographics</b>            |                                        |        |        |        |        |        |
| Income (mean \$)               | 27222                                  | 28601  | 28408  | 26604  | 26632  | 27 509 |
| Some High School               | 83.0                                   | 86.5   | 83.4   | 83.5   | 80.2   | 83.3   |
| Aboriginal                     | 3.6                                    | 2.4    | 5.8    | 5.9    | 10.9   | 5.8    |
| Urban (CMA or CA)              | 86.8                                   | 93.1   | 84.9   | 78.5   | 60.1   | 80.7   |
| <b>Delivery Hospital</b>       |                                        |        |        |        |        |        |
| Level 3                        | 9.4                                    | 24.9   | 37.4   | 35.7   | 23.2   | 26.3   |
| Annual Vol (mean)              | 2626                                   | 3579   | 2936   | 3462   | 2016   | 2923   |
| <b>Delivery Provider</b>       |                                        |        |        |        |        |        |
| Annual Vol (mean)              | 269                                    | 260    | 252    | 176    | 96     | 210    |
| Obstetrician                   | 95.7                                   | 90.8   | 83.2   | 59.8   | 30.9   | 71.9   |
| Midwife*                       | 3.8                                    | 4.5    | 4.3    | 3.5    | 2.8    | 3.8    |
| <b>Maternal</b>                |                                        |        |        |        |        |        |
| Age (mean yrs.)                | 29.3                                   | 30.5   | 29.0   | 29.3   | 28.2   | 29.2   |
| Caesarean                      | 28.4                                   | 28.5   | 27.2   | 27.9   | 28.0   | 28.0   |
| Prior Caesarean                | 13.1                                   | 13.3   | 12.5   | 12.9   | 13.0   | 13.0   |
| Type 1 DM                      | 0.3                                    | 0.3    | 0.3    | 0.3    | 0.2    | 0.3    |
| Type 2 DM                      | 0.3                                    | 0.3    | 0.4    | 0.3    | 0.3    | 0.3    |

|                     |      |      |      |      |      |      |
|---------------------|------|------|------|------|------|------|
| GDM                 | 4.5  | 5.1  | 4.1  | 5.8  | 4.0  | 4.7  |
| Eclampsia           | 0.08 | 0.06 | 0.06 | 0.04 | 0.06 | 0.06 |
| PIH                 | 5.7  | 5.4  | 6.5  | 6.2  | 6.4  | 6.0  |
| HIV                 | 0.05 | 0.05 | 0.06 | 0.08 | 0.04 | 0.06 |
| <b>Neonatal</b>     |      |      |      |      |      |      |
| Male                | 51.2 | 51.3 | 51.2 | 51.5 | 51.2 | 51.3 |
| GA (mean weeks)     | 38.9 | 38.9 | 38.9 | 38.9 | 39.1 | 38.9 |
| Weight (mean g)     | 3382 | 3360 | 3417 | 3393 | 3443 | 3399 |
| Congenital anomaly  | 3.0  | 2.8  | 3.3  | 3.2  | 2.8  | 3.0  |
| Abruptio placenta   | 0.1  | 0.1  | 0.3  | 0.2  | 0.1  | 0.2  |
| PROM                | 0.3  | 0.2  | 1.3  | 0.6  | 0.3  | 0.6  |
| Perinatal Mortality | 0.46 | 0.44 | 0.37 | 0.42 | 0.38 | 0.41 |

Abbreviations: CA, census agglomeration; CMA, census metropolitan area; CS, Caesarean Section; Deliv Vol, delivery volume; DM, diabetes mellitus; GA, gestational age; GDM, gestational DM; PIH, pregnancy induced hypertension; PROM, premature rupture of membranes; Vol, volume; Weight, foetal weight;

\*Records with data missing and deliveries by midwives were excluded from the final analysis.

<sup>†</sup> Mean predicted caesarean section rate was calculated from a logistic regression model including all covariates except for delivery provider.

Table 2: Ratio of Caesarean delivery risk for family physicians vs obstetricians using logistic and IV adjusted regression.

| Method                     | Caesarean Delivery |         | Procedural Delivery <sup>†</sup> |         |
|----------------------------|--------------------|---------|----------------------------------|---------|
|                            | RR (95% CI)        | p       | RR (95% CI)                      | p       |
| <b>Logistic Regression</b> |                    |         |                                  |         |
| Unadjusted                 | 0.33 (0.27-0.40)   | <0.0001 | 0.50 (0.45-0.54)                 | <0.0001 |
| Multivariate adjusted*     | 0.48 (0.41-0.56)   | <0.0001 | 0.61 (0.56-0.67)                 | <0.0001 |
| <b>GMM (IV adjusted)</b>   |                    |         |                                  |         |
| Unadjusted                 | 0.96 (0.79-1.17)   | 0.694   | 0.94 (0.82-1.09)                 | 0.414   |
| Multivariate adjusted*     | 1.27 (1.02-1.57)   | 0.030   | 1.16 (0.99-1.35)                 | 0.065   |

Abbreviations: CI, confidence interval; GMM, generalized method of moments; IV, instrumental variable; RR, rate ratio

\*Multivariate adjusted models controlled for all comorbidities listed in supplementary material

<sup>†</sup>Procedural delivery includes caesarean section, and vacuum and forceps assisted vaginal deliveries.



Figure 1: Cohort exclusions flow diagram.

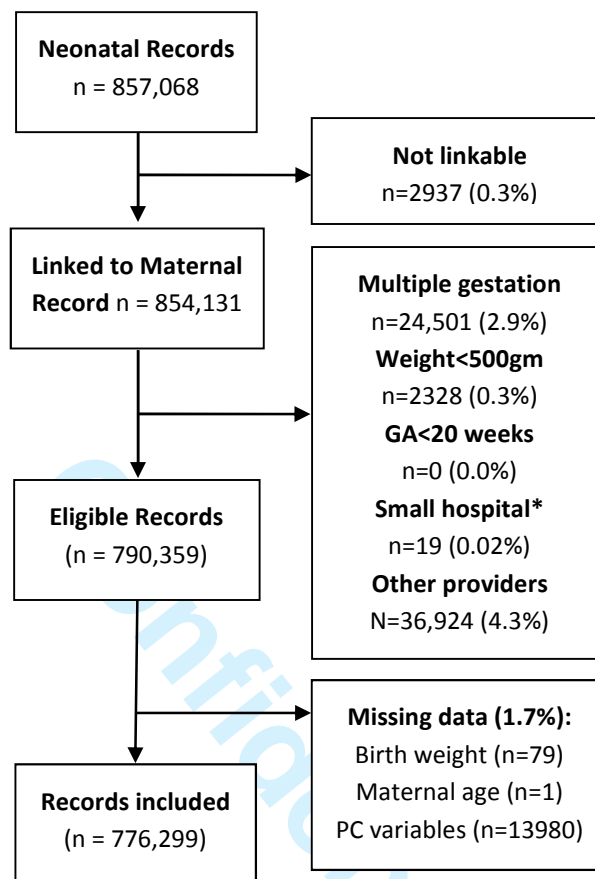

Abbreviations: GA, gestational age; PC, postal code

\*Hospitals with less than 20 caesarean sections performed on women living within their catchment areas were excluded.

## Caesarean Section Study Appendix

**METHODS****Instrumental Variable**

The *local* rather than delivery hospital (in many cases the same hospital) was used because high risk women are selectively referred to more specialized hospitals (where a higher percentage of deliveries may be by obstetricians). We believe that using the local rather than delivery hospital in this fashion was critical to minimize the possibility that the instrumental variable was associated with unobserved confounders. Living in regions with different proportions of deliveries by family physicians should affect the probability of being delivered by a family physician, but should not directly affect the risk of having a caesarean section, after adjustment for additional covariates such as obstetrical comorbidity. Thus, this variable meets the requirement that an IV is not directly associated with the dependent (outcome) variable. An additional requirement is that the IV is not directly related to the error term in a regression equation. In the case of the current study, this would require that unmeasured risk factors are evenly distributed across the catchment areas of different hospitals. While this cannot be proven, it is commonly assumed that this is the case if *measured* covariates are similar across regions with different levels of the IV, and if the correlation between the IV and the predicted risk of outcome is negligible. We therefore divided home hospital delivery volume into quintiles and compared comorbidities across these quintiles as a check of the suitability of our IV. We also used the Kleibergen-Paap rk first-stage F-statistic reported in the Stata IVREG2 output as a measure of instrumental variable strength. [17]

**Hospital Service Level and Delivery Volume**

Each hospital in our dataset was assigned a service level according to guidelines provided by the Canadian Pediatric Society[19] with modifications for use with administrative data: 1. Tertiary: All hospitals so described by the Canadian Perinatal Network for the time period [20]; 2. Secondary: Those that delivered a minimum of 25% of the 32-34 week gestational age (GA) newborns with a length of hospital stay of at least 5 days from their catchment areas for the study period. Because of uncertainty about the level of care, small volume hospitals with less than 12 deliveries at 32-34 week GA from their catchments during the study period were classified as primary care hospitals regardless of whether they met the percentage criterion above; 3. Primary: Those that delivered a minimum of 10% of the 35 week or greater GA newborns from their catchment areas for the study period. 4. Level 0 hospitals were those not meeting the criteria above. We conducted sensitivity analyses including only a tertiary hospital term and excluding delivery hospital level entirely from our regression analyses. The number of deliveries at the delivery hospital was entered into our models as a continuous variable.

**Covariates in regression models**

Six digit patient postal codes were mapped to the best match Statistics Canada Census Dissemination Area using the Postal Code Conversion File. [11] Median income, percent of the population with at least high school education, percent aboriginal and the unemployment rate in the maternal residential census dissemination area were entered as continuous covariates. Residential Statistical Area Classifications were dummy coded into urban (census metropolitan area and census agglomerations), strong, moderate, weak and no metropolitan influenced zone rural subheadings, and territories. [10] Analyses were adjusted for the variables described in Table 1. When not recorded, delivery gestational age was

1  
2  
3 approximated using the admission gestational age and the difference between the dates of admission  
4 and delivery.  
5  
6  
7  
8  
9  
10  
11  
12  
13  
14  
15  
16  
17  
18  
19  
20  
21  
22  
23  
24  
25  
26  
27  
28  
29  
30  
31  
32  
33  
34  
35  
36  
37  
38  
39  
40  
41  
42  
43  
44  
45  
46  
47  
48  
49  
50  
51  
52  
53  
54  
55  
56  
57  
58  
59  
60

Confidential

**Table 1:** Covariates included in multivariate analyses (Codes are maternal ICD-10-CA codes unless otherwise specified)

| Covariate                | Definition                                                                                                                                                                                      |
|--------------------------|-------------------------------------------------------------------------------------------------------------------------------------------------------------------------------------------------|
| Median income*           | Median income of all persons 15 years of age or older in a residential household                                                                                                                |
| Education rate*          | Proportion of census respondents who graduated high school                                                                                                                                      |
| Aboriginal population*   | Percentage of census respondents that reported identifying with at least one aboriginal group, being a Treaty Indian or Registered Indian, or being a member of an Indian Band or First Nation. |
| Minority status*         | Percentage of census respondents self-identifying as a visible minority (non-aboriginal, non-Caucasian, non-white in colour)                                                                    |
| Delivery hospital volume | Average number of deliveries per year at the delivery hospital based on the current dataset, dummy coded into quintiles                                                                         |
| Delivery hospital level  | The level of obstetrical service offered, dummy coded into Levels 0, 1, 2 or 3 (see Methods)                                                                                                    |
| Provider volume          | Volume of deliveries by delivery provider, dummy coded into quintiles                                                                                                                           |
| Maternal age             | Maternal age in years at delivery, dummy coded (<15, 16-20, 21-25, ..., 41-45, >45)                                                                                                             |
| Gestational age          | Maternal analysis: Gestational age in weeks at delivery, dummy coded (<27, 27-28, 29-30, ... 40-41, >41)                                                                                        |
| Neonatal gender          | Dummy coded into female (reference), male, or other                                                                                                                                             |
| HIV                      | Maternal record: B24 or Z21                                                                                                                                                                     |

|                                   |                                                                                                      |
|-----------------------------------|------------------------------------------------------------------------------------------------------|
| Type 1 DM                         | Maternal record: E10.0, 10.2-9, or O24.5                                                             |
| Type 2 DM                         | Maternal record: E11.0, 11.2-9, or O24.6                                                             |
| Gestational DM                    | Maternal record: O24.8 or<br>Neonatal record: P70.0                                                  |
| DM, other or unspecified*         | Maternal record: E13.0, 13.2-9, 14.0, 14.2-9, H36.0, or O24.7 or<br>neonatal record contains P70.1-2 |
| Cystic fibrosis                   | Maternal record: E84                                                                                 |
| Rheumatic heart disease           | Maternal record: I05-09                                                                              |
| Hypertension                      | Maternal record: I10.0-1, 15.9, O10.0-1, 10.3-9, 13, 14, or 16 or<br>neonatal record contains P00.0  |
| Ischemic heart disease            | Maternal record: I25.2, or 25.5-9                                                                    |
| Pulmonary hypertension            | Maternal record: I27.0 or 27.8-9                                                                     |
| SLE                               | Maternal record: M32                                                                                 |
| Chronic renal disease             | Maternal record: N01, 03-04, 18, 25, or 26                                                           |
| Birth weight                      | Weight of fetus, dummy coded (500-999 gm and 500 gm increments<br>up to >4500 gm)                    |
| Premature rupture of<br>membranes | Maternal record: O42<br>Neonatal record: P01.1                                                       |
| Oligohydramnios                   | Neonatal record: P01.2                                                                               |
| Abruptio placentae                | Maternal record: O45<br>Neonatal: P02.1                                                              |
| Prolapsed umbilical cord          | Neonatal record: P02.4                                                                               |
| Noxious influences                | Neonatal record: P04                                                                                 |

|                                            |                                                     |
|--------------------------------------------|-----------------------------------------------------|
| transmitted via placenta or<br>breast milk |                                                     |
| Congenital anomalies                       | Neonatal record: D21.5, D82.1, P35.0-1, or P37.1, Q |
| Hydrops fetalis                            | Neonatal record: P56.0                              |
| Eclampsia                                  | Maternal record: O15                                |
| Other maternal conditions                  | Neonatal record: P00.8                              |
| Previous caesarean                         | Maternal record: O34.20 or 75.7                     |

Abbreviations: DM, Diabetes Mellitus; SLE, Systemic Lupus Erythematosus

\* Statistics Canada Census, 2006

\*DM, unspecified only coded if other DM variables marked "no"

1 February 7, 2017

2  
3 Dear Editor,

4  
5 Please see the following STROBE statement for cohort studies. Beneath each recommendation (the  
6 right-hand column) you will find a reference, in bold font, to which page and/or section of the  
7 manuscript addresses each relevant item.  
8  
9

10 Sincerely,

11  
12 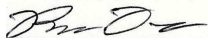

13 Russell Dawe

14 Primary Investigator  
15  
16  
17  
18

19 STROBE Statement—Checklist of items that should be included in reports of *cohort studies*

|                           | Item No | Recommendation                                                                                                                                                                                                                                                                                                                                                            |
|---------------------------|---------|---------------------------------------------------------------------------------------------------------------------------------------------------------------------------------------------------------------------------------------------------------------------------------------------------------------------------------------------------------------------------|
| <b>Title and abstract</b> | 1       | (a) Indicate the study's design with a commonly used term in the title or the abstract<br><b>Addressed in manuscript on Page(P)1, Line(L)2</b><br>(b) Provide in the abstract an informative and balanced summary of what was done and what was found<br><b>P3-4 (see Abstract)</b>                                                                                       |
| <b>Introduction</b>       |         |                                                                                                                                                                                                                                                                                                                                                                           |
| Background/rationale      | 2       | Explain the scientific background and rationale for the investigation being reported<br><b>P5-6, L7-9: need to lower caesarean section rates</b><br><b>P5, L10-12: family physicians previously found to have lower or equivalent caesarean section rates to obstetricians</b><br><b>P5, L20 – P6, L4: need for instrumental variable method to address this question</b> |
| Objectives                | 3       | State specific objectives, including any prespecified hypotheses<br><b>P6, L4-6</b>                                                                                                                                                                                                                                                                                       |
| <b>Methods</b>            |         |                                                                                                                                                                                                                                                                                                                                                                           |
| Study design              | 4       | Present key elements of study design early in the paper<br><b>P6 (see Study Design, Data Sources and Population)</b>                                                                                                                                                                                                                                                      |
| Setting                   | 5       | Describe the setting, locations, and relevant dates, including periods of recruitment, exposure, follow-up, and data collection<br><b>P6 (see Study Design, Data Sources and Population)</b><br><b>P8-9 (see Hospital Catchment Areas)</b>                                                                                                                                |
| Participants              | 6       | (a) Give the eligibility criteria, and the sources and methods of selection of participants. Describe methods of follow-up<br><b>P6-7 (see Study Design, Data Sources and Population; Record Linkage and Group Assignment)</b><br>(b) For matched studies, give matching criteria and number of exposed and unexposed<br><b>N/A</b>                                       |
| Variables                 | 7       | Clearly define all outcomes, exposures, predictors, potential confounders, and effect modifiers. Give diagnostic criteria, if applicable.<br><b>P7-8 (see Instrumental Variable)</b>                                                                                                                                                                                      |

|                              |     |                                                                                                                                                                                                                                                                                                                                                                                                                                                                                                                                                |
|------------------------------|-----|------------------------------------------------------------------------------------------------------------------------------------------------------------------------------------------------------------------------------------------------------------------------------------------------------------------------------------------------------------------------------------------------------------------------------------------------------------------------------------------------------------------------------------------------|
|                              |     | <b>P9-10 (see Study Outcome and Statistical Analysis)</b>                                                                                                                                                                                                                                                                                                                                                                                                                                                                                      |
| Data sources/<br>measurement | 8*  | For each variable of interest, give sources of data and details of methods of assessment (measurement). Describe comparability of assessment methods if there is more than one group<br><b>P6-7 (see Study Design, Data Sources and Population; Record Linkage and Group Assignment)</b>                                                                                                                                                                                                                                                       |
| Bias                         | 9   | Describe any efforts to address potential sources of bias<br><b>P7-8 (see Instrumental Variable)</b>                                                                                                                                                                                                                                                                                                                                                                                                                                           |
| Study size                   | 10  | Explain how the study size was arrived at<br><b>P6 (see Study Design, Data Sources and Population)</b><br><b>Figure 1</b>                                                                                                                                                                                                                                                                                                                                                                                                                      |
| Quantitative variables       | 11  | Explain how quantitative variables were handled in the analyses. If applicable, describe which groupings were chosen and why<br><b>P6-7 (see Study Design, Data Sources and Population; Record Linkage and Group Assignment)</b><br><b>P7-8 (see Instrumental Variable)</b>                                                                                                                                                                                                                                                                    |
| Statistical methods          | 12  | (a) Describe all statistical methods, including those used to control for confounding<br><b>P7-8 (see Instrumental Variable)</b><br><b>P9-10 (see Study Outcome and Statistical Analysis)</b><br>(b) Describe any methods used to examine subgroups and interactions<br>N/A<br>(c) Explain how missing data were addressed<br><b>P6-7 (see Record Linkage and Group Assignment)</b><br>(d) If applicable, explain how loss to follow-up was addressed<br>N/A<br>(e) Describe any sensitivity analyses<br><b>P11 (see Sensitivity Analysis)</b> |
| <b>Results</b>               |     |                                                                                                                                                                                                                                                                                                                                                                                                                                                                                                                                                |
| Participants                 | 13* | (a) Report numbers of individuals at each stage of study—e.g. numbers potentially eligible, examined for eligibility, confirmed eligible, included in the study, completing follow-up, and analysed<br><b>P10 (see Results)</b><br><b>Table 1</b><br>(b) Give reasons for non-participation at each stage<br><b>Figure 1</b><br>(c) Consider use of a flow diagram<br><b>Figure 1</b>                                                                                                                                                          |
| Descriptive data             | 14* | (a) Give characteristics of study participants (eg demographic, clinical, social) and information on exposures and potential confounders<br><b>Table 1</b><br>(b) Indicate number of participants with missing data for each variable of interest<br><b>Table 1</b><br>(c) Summarise follow-up time (e.g., average and total amount)<br>N/A                                                                                                                                                                                                    |
| Outcome data                 | 15* | Report numbers of outcome events or summary measures over time<br><b>Table 2</b>                                                                                                                                                                                                                                                                                                                                                                                                                                                               |
| Main results                 | 16  | (a) Give unadjusted estimates and, if applicable, confounder-adjusted estimates and their precision (e.g., 95% confidence interval). Make clear which confounders were adjusted for and why they were included                                                                                                                                                                                                                                                                                                                                 |



|                          |    |                                                                                                                                                                                                                               |
|--------------------------|----|-------------------------------------------------------------------------------------------------------------------------------------------------------------------------------------------------------------------------------|
|                          |    | <b>Table 2</b>                                                                                                                                                                                                                |
|                          |    | <b>Table 1</b>                                                                                                                                                                                                                |
|                          |    | <b>P7-8 (see Instrumental Variable)</b>                                                                                                                                                                                       |
|                          |    | <b>P9-10 (see Study Outcome and Statistical Analysis)</b>                                                                                                                                                                     |
|                          |    | (b) Report category boundaries when continuous variables were categorized                                                                                                                                                     |
|                          |    | <b>Table 1</b>                                                                                                                                                                                                                |
|                          |    | (c) If relevant, consider translating estimates of relative risk into absolute risk for a meaningful time period                                                                                                              |
|                          |    | N/A                                                                                                                                                                                                                           |
| Other analyses           | 17 | Report other analyses done—eg analyses of subgroups and interactions, and sensitivity analyses<br><b>P9-10 (see Study Outcome and Statistical Analysis)</b><br><b>P11 (see Sensitivity Analysis)</b>                          |
| <b>Discussion</b>        |    |                                                                                                                                                                                                                               |
| Key results              | 18 | Summarise key results with reference to study objectives<br><b>P11, L8-12 (see Interpretation)</b>                                                                                                                            |
| Limitations              | 19 | Discuss limitations of the study, taking into account sources of potential bias or imprecision. Discuss both direction and magnitude of any potential bias<br><b>P13-14 (see Limitations)</b>                                 |
| Interpretation           | 20 | Give a cautious overall interpretation of results considering objectives, limitations, multiplicity of analyses, results from similar studies, and other relevant evidence<br><b>P11, L12 – P13, L12 (see Interpretation)</b> |
| Generalisability         | 21 | Discuss the generalisability (external validity) of the study results<br><b>P12, L17- P13, L6 (see Interpretation)</b>                                                                                                        |
| <b>Other information</b> |    |                                                                                                                                                                                                                               |
| Funding                  | 22 | Give the source of funding and the role of the funders for the present study and, if applicable, for the original study on which the present article is based<br><b>P1-2 (see Funding)</b>                                    |

\*Give information separately for exposed and unexposed groups.

**Note:** An Explanation and Elaboration article discusses each checklist item and gives methodological background and published examples of transparent reporting. The STROBE checklist is best used in conjunction with this article (freely available on the Web sites of PLoS Medicine at <http://www.plosmedicine.org/>, Annals of Internal Medicine at <http://www.annals.org/>, and Epidemiology at <http://www.epidem.com/>). Information on the STROBE Initiative is available at <http://www.strobe-statement.org>.
